# Supplementary material for: A WS2/Co9S8 heterostructure with a carbon layer anchored in nitrogen-doped graphene foam as an anode for boosting lithium storage
Source: Royal Society of Chemistry journal article supplement (doi:10.1039/d4qi01221f), 2024-01-01
Supplement: d4qi01221f1.pdf [file d4qi01221f1.pdf]

### Supporting Information

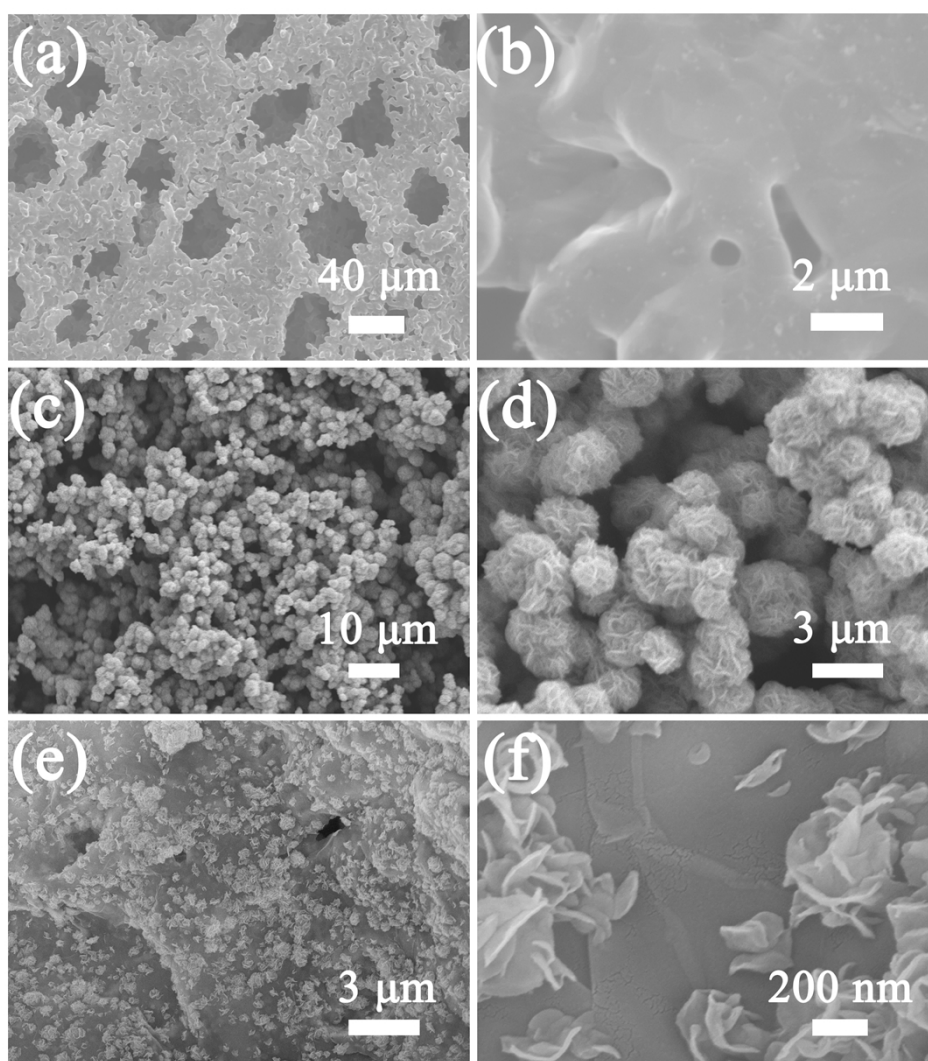

**Fig. S1.** FESEM images of (a, b) NPG and NPG@WS<sub>2</sub> prepared at (c, d) high and (e, f) low concentrations.

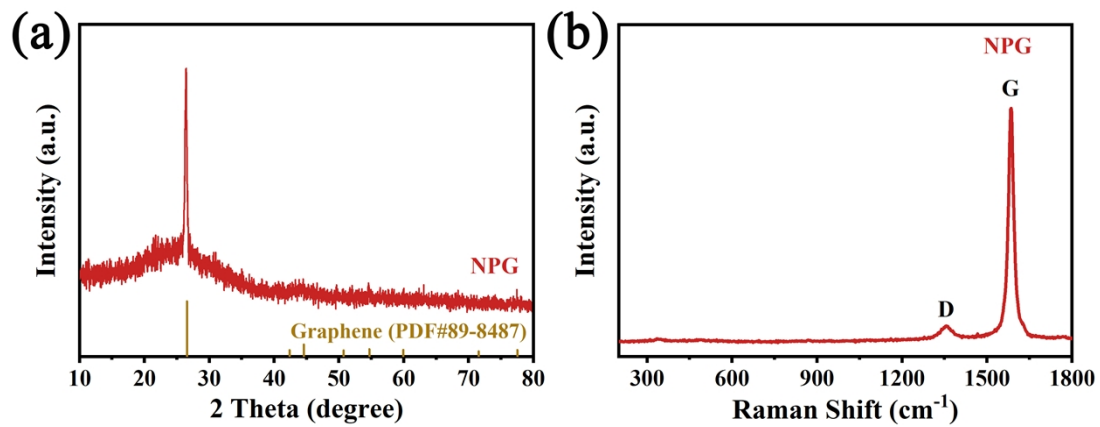

Fig. S2. (a) XRD patterns and (b) Raman spectra of NPG.

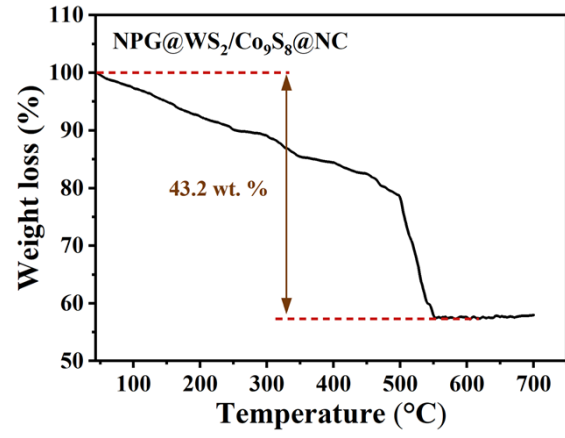

**Fig. S3.** TG analysis of NPG@WS<sub>2</sub>/Co<sub>9</sub>S<sub>8</sub>@NC.

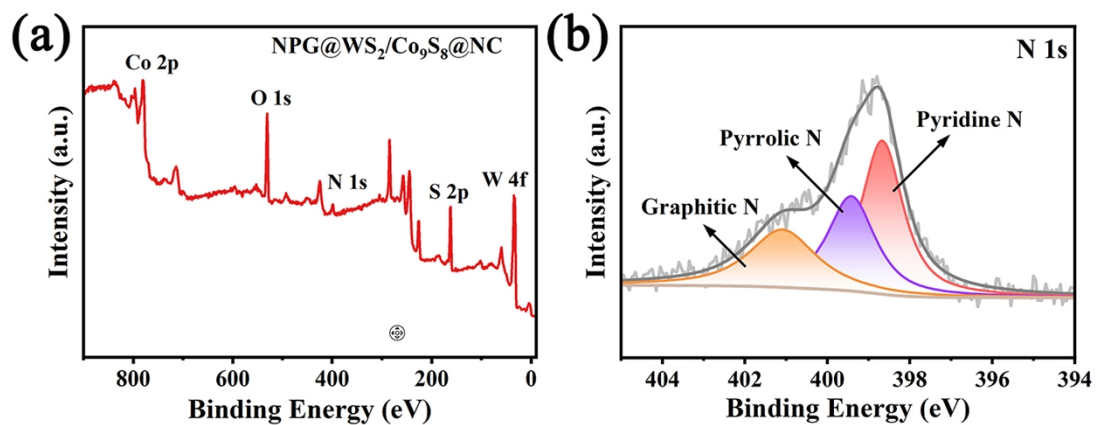

**Fig. S4.** XPS analysis of (a) NPG@WS<sub>2</sub>/Co<sub>9</sub>S<sub>8</sub>@NC and (b) high-resolution N 1s.

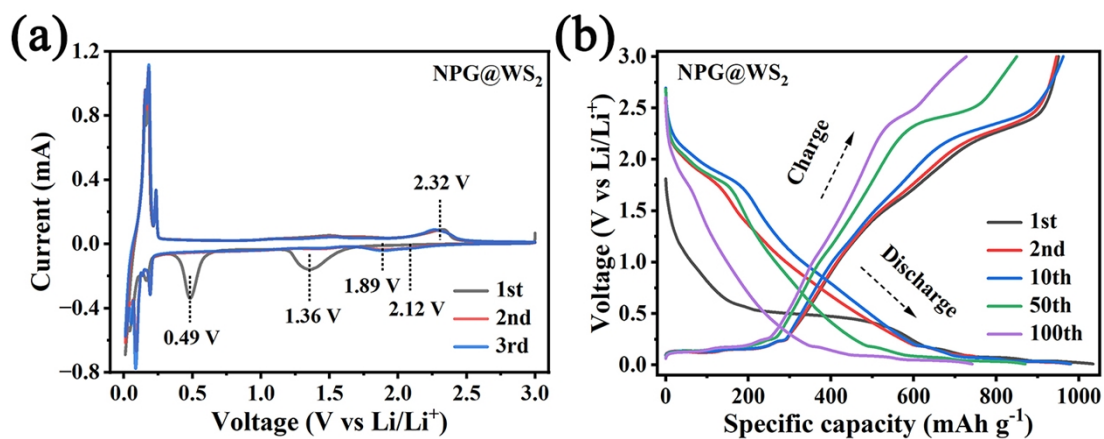

**Fig. S5.** (a) The initial three CV curves at a scan rate of  $0.1 \text{ mV s}^{-1}$  and (b) the 1st, 2nd, 10th, 50th and 100th galvanostatic discharge/charge curves of NPG@WS<sub>2</sub> as anode for LIB within a voltage window of 0.01-3.0 V at a current density of  $500 \text{ mA g}^{-1}$ .

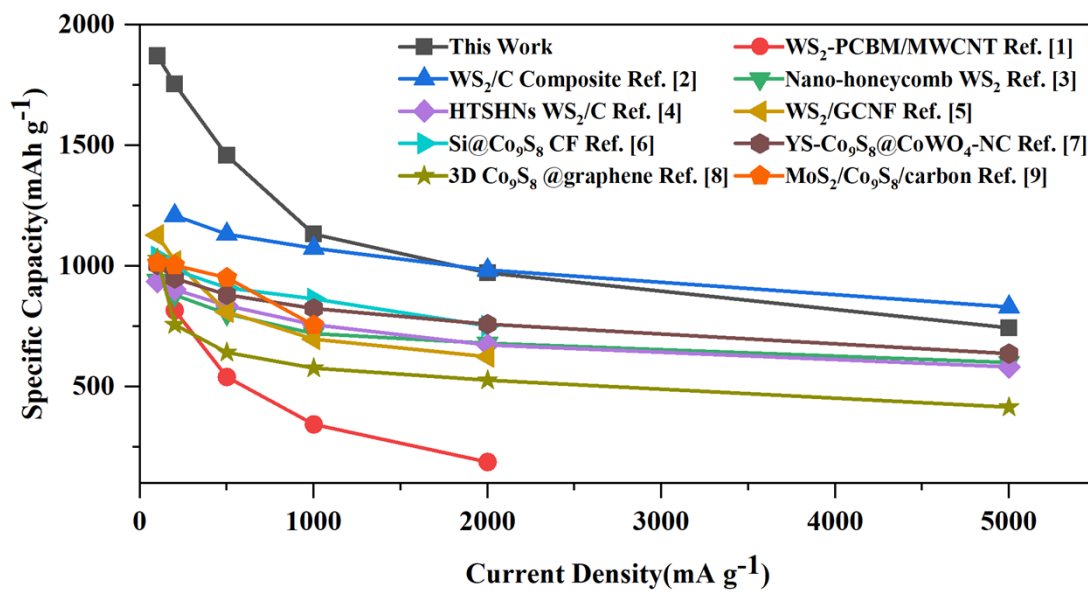

**Fig. S6.** Comparison of rate capability for LIBs between NPG@WS<sub>2</sub>/Co<sub>9</sub>S<sub>8</sub>@NC and WS<sub>2</sub>-based (or Co<sub>9</sub>S<sub>8</sub>-based) anodes reported in the recent literatures.

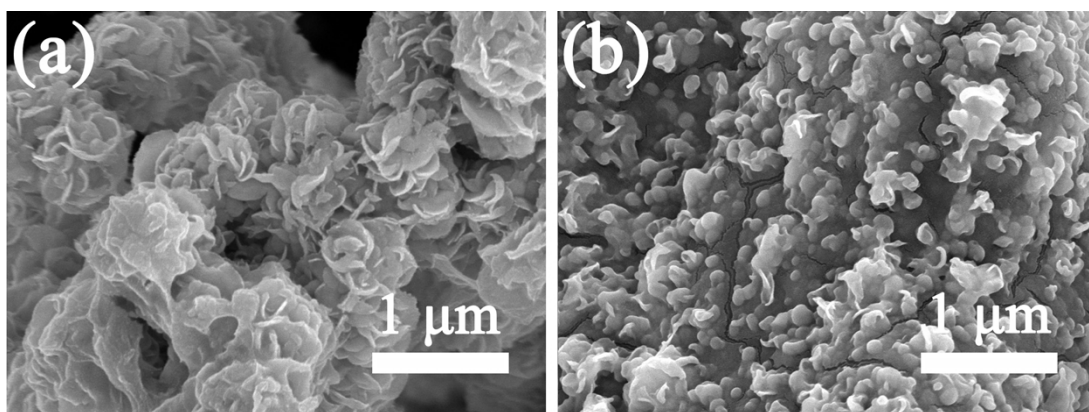

**Fig. S7.** SEM images of (a) NPG@WS<sub>2</sub>/Co<sub>9</sub>S<sub>8</sub>@NC and (b) NPG@WS<sub>2</sub> materials after 200 cycles at 0.5 A g<sup>-1</sup>.

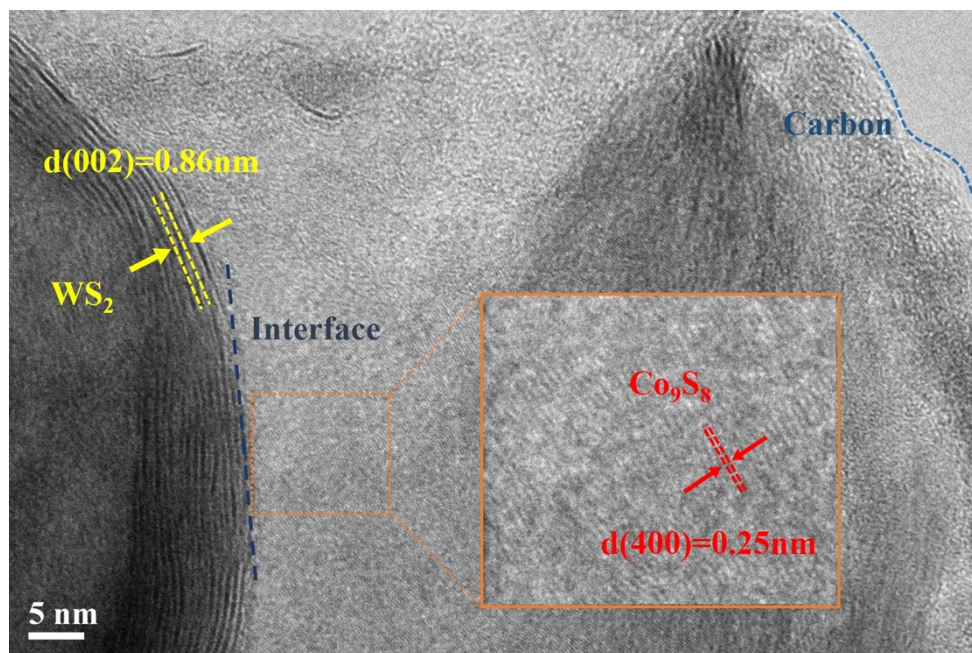

**Fig. S8.** HRTEM image of NPG@WS<sub>2</sub>/Co<sub>9</sub>S<sub>8</sub>@NC materials after 200 cycles at 0.5 A g<sup>-1</sup>.



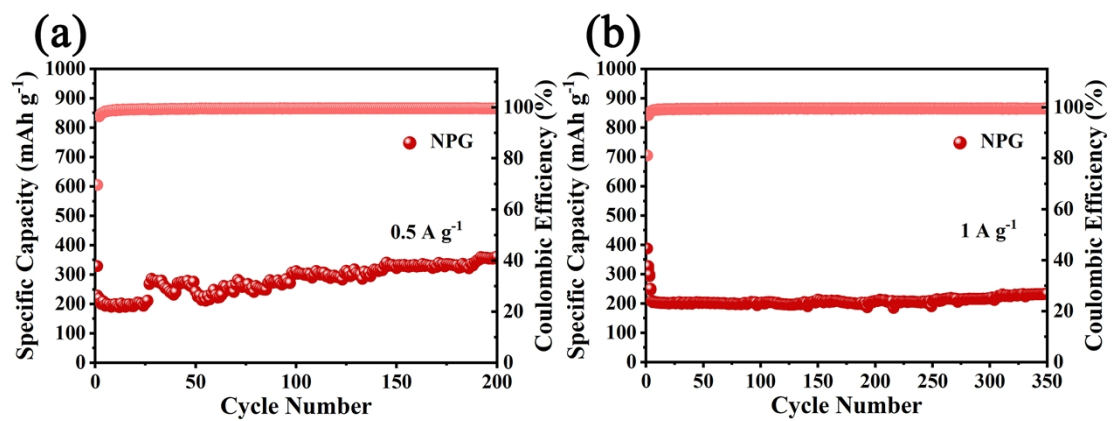

**Fig. S9.** Cycling performance and Coulombic efficiency of NPG at (a)  $0.5 \text{ A g}^{-1}$  and (b)  $1 \text{ A g}^{-1}$

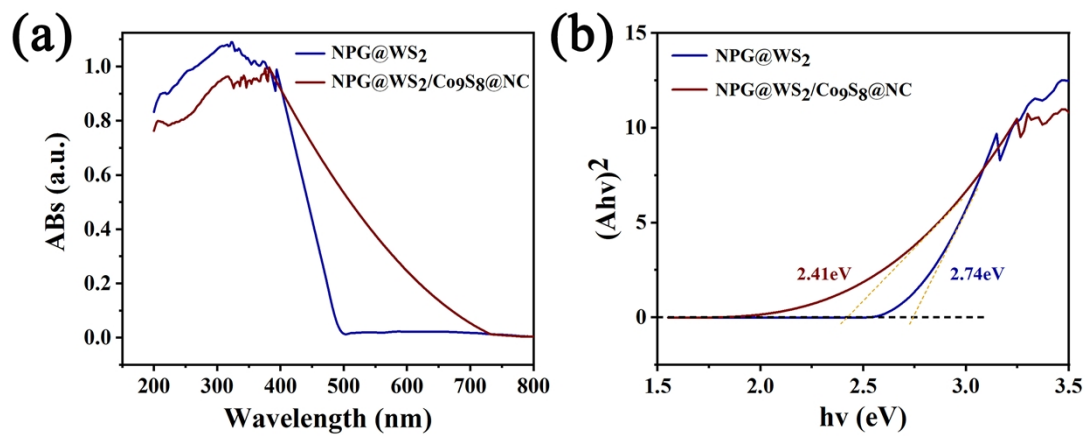

**Fig. S10.** (a) UV-vis DRS spectra and (b) Tauc plots of NPG@WS<sub>2</sub> and NPG@WS<sub>2</sub>/Co<sub>9</sub>S<sub>8</sub>@NC.

**Table S1.** Comparison of cycling performance for LIBs between NPG@WS<sub>2</sub>/Co<sub>9</sub>S<sub>8</sub>@NC and WS<sub>2</sub>-based (or Co<sub>9</sub>S<sub>8</sub>-based) anodes reported in the recent literatures.

| Materials                                                | Current density<br>(mA g <sup>-1</sup> ) | Cycles | Capacity<br>(mAh g <sup>-1</sup> ) | Ref.      |
|----------------------------------------------------------|------------------------------------------|--------|------------------------------------|-----------|
| WS <sub>2</sub> -PCBM/MWCNT                              | 500                                      | 50     | 655.47                             | 1         |
| WS <sub>2</sub> /C Composite                             | 500                                      | 1000   | 1166.8                             | 2         |
| Nano-honeycomb WS <sub>2</sub>                           | 1000                                     | 300    | 800                                | 3         |
| HTSHNs WS <sub>2</sub> /C                                | 1000                                     | 1000   | 784                                | 4         |
| WS <sub>2</sub> /GCNF                                    | 100                                      | 100    | 1068.5                             | 5         |
| Si@Co <sub>9</sub> S <sub>8</sub> CF                     | 1000                                     | 250    | 633.6                              | 6         |
| YS-Co <sub>9</sub> S <sub>8</sub> @CoWO <sub>4</sub> -NC | 500                                      | 100    | 1053                               | 7         |
| 3D Co <sub>9</sub> S <sub>8</sub> @graphene              | 1000                                     | 1000   | 550                                | 8         |
| MoS <sub>2</sub> /Co <sub>9</sub> S <sub>8</sub> /carbon | 200                                      | 50     | 987.7                              | 9         |
| NPG@WS <sub>2</sub> /Co <sub>9</sub> S <sub>8</sub> @NC  | 500                                      | 200    | 1896                               | This work |

**Table S2.** EIS specific descriptions of NPG@WS<sub>2</sub> and NPG@WS<sub>2</sub>/Co<sub>9</sub>S<sub>8</sub>@NC electrode at various states.

| Samples                                                                 | Rs (Ω) | Rct (Ω) |
|-------------------------------------------------------------------------|--------|---------|
| NPG@WS <sub>2</sub> /Co <sub>9</sub> S <sub>8</sub> @NC after 10 cycles | 1.59   | 162.5   |
| Fresh NPG@WS <sub>2</sub> /Co <sub>9</sub> S <sub>8</sub> @NC           | 2.91   | 489.8   |
| NPG@WS <sub>2</sub>                                                     | 16.52  | 679.5   |

## References

1. B. Mondal, A. Azam and S. Ahmad, PCBM Functionalized WS<sub>2</sub> Hybrid Nanostructures for High Performance Li-Ion Battery Anodes: Toward Binder-Free Electrodes, *Energy Fuels*, 2023, **37**, 16105-16118.
2. Z. W. Li, F. Yuan, M. S. Han and J. Yu, Atomic-Scale Laminated Structure of O-Doped WS<sub>2</sub> and Carbon Layers with Highly Enhanced Ion Transfer for Fast-Charging Lithium-Ion Batteries, *Small*, 2022, **18**, 2202495.
3. Y. C. Song, J. X. Liao, C. Chen, J. Yang, J. C. Chen, F. Gong, S. Z. Wang, Z. Q. Xu and M. Q. Wu, Controllable morphologies and electrochemical performances of self-assembled nano-honeycomb WS<sub>2</sub> anodes modified by graphene doping for lithium and sodium ion batteries, *Carbon*, 2019, **142**, 697-706.
4. X. E. Zhang, R. F. Zhao, Q. H. Wu, W. L. Li, C. Shen, L. B. Ni, H. Yan, G. W. Diao and M. Chen, Ultrathin WS<sub>2</sub> nanosheets vertically embedded in a hollow mesoporous carbon framework - a triple-shell structure with enhanced lithium storage and electrocatalytic properties, *J. Mater. Chem. A*, 2018, **6**, 19004-19012.
5. L. S. Zhang, W. Fan and T. X. Liu, Flexible hierarchical membranes of WS<sub>2</sub> nanosheets grown on graphene-wrapped electrospun carbon nanofibers as advanced anodes for highly reversible lithium storage, *Nanoscale*, 2016, **8**, 16387-16394.
6. X. P. Du, Y. Huang, Z. H. Feng, X. P. Han, J. M. Wang and X. Sun, Encapsulating yolk-shelled Si@Co<sub>9</sub>S<sub>8</sub> particles in carbon fibers to construct a free-standing anode for lithium-ion batteries, *Appl. Surf. Sci.*, 2023, **610**, 155491.
7. Y. Zheng, Y. Xu, J. P. Guo, J. D. Li, J. J. Shen, Y. Guo, X. Z. Bao, Y. K. Huang, Q. Zhang, J. C. Xu, J. Wu, H. Ian and H. Y. Shao, Cobalt sulfide nanoparticles restricted in 3D hollow cobalt tungstate nitrogen-doped carbon frameworks incubating stable interfaces for Li-ion storage, *Electrochim. Acta*, 2022, **431**, 141134.
8. S. Y. Xu, X. C. Cao, F. Li, H. Li, H. Y. Qi, J. Zhang, C. Y. Chen and D. C. Ju, Novel 3D Co<sub>9</sub>S<sub>8</sub>@graphene nanocomposites prepared by deep eutectic solvents for lithium-ion storage, *J. Alloys Compd.*, 2023, **936**, 168080.
9. B. Wu, R. Ma, X. W. Liu, Y. Q. Zheng, S. S. Guo, Y. M. Yi, M. T. Sun, S. H. Wang and T. Wen, Self-assembly synthesis of petal-like MoS<sub>2</sub>/Co<sub>9</sub>S<sub>8</sub>/carbon nanohybrids for enhanced lithium storage performance, *Front. Energy Res.*, 2022, **10**, 918494.
